# Supplementary material for: Interprofessional Collaboration Improves Patient Safety: A Review
Source: Preprints.org preprint supplement (doi:10.20944/preprints202104.0230.v1), 2021-04-08
Supplement: Supplementary file 1 [file supplementary]

# interprofessional collaboration improves patient safety 1

*by* Muh Abdurrouf

---

**Submission date:** 03-Apr-2021 02:30PM (UTC+0800)

**Submission ID:** 1549500562

**File name:** ducation\_meningkatkan\_keselamatan\_pasien\_indonesia\_turnitin.docx (68.37K)

**Word count:** 3326

**Character count:** 22731

## Interprofesional Collaboration Meningkatkan Keselamatan Pasien ; A review

Muh. Abdurrouf<sup>1\*</sup>, Moses Glorino Rumambo Pandin<sup>2</sup>

Corresponding Authors: Muh. Abdurrouf, Student at Faculty of Nursing, Universitas Airlangga,

Email : [muh.abdurrouf-2020@fkip.unair.ac.id](mailto:muh.abdurrouf-2020@fkip.unair.ac.id), [moses.glorino@fib.unair.ac.id](mailto:moses.glorino@fib.unair.ac.id)

Affiliation: <sup>1</sup>Student at Faculty of Nursing, Universitas Airlangga

<sup>2</sup>Lecture at Faculty of Humanities, Universitas Airlangga

9

### ABSTRAK

Keselamatan pasien merupakan salah satu indikator mutu pelayanan keperawatan di rumah sakit, untuk itu perlu adanya upaya dari rumah sakit untuk menciptakan sistem yang dapat meminimalkan terjadinya kesalahan tindak<sup>21</sup> dan kejadian yang tidak diharapkan yang dapat merugikan pasien, perawat sebagai tenaga kesehatan yang jumlahnya paling banyak<sup>20</sup> di rumah sakit dan bersama pasien selama 24 jam, mempunyai peran penting dalam menjaga keselamatan pasien. Penelitian ini bertujuan untuk menjelaskan bagaimana peran perawat dan <sup>8</sup> rjasama antar tenaga kesehatan dalam menerapkan tindakan keselamatan pasien (patient safety) di rumah sakit. Metode yang digunakan dalam penelitian ini adalah literature review dengan cara menganalisis dan mengeksplorasi artikel-artikel yang relevan <sup>16</sup> fokus pada interprofesional collaboration untuk meningkatkan keselamatan pasien. Artikel yang digunakan dalam penelitian ini diambil dari <sup>3</sup> database science direct, proquest dan Pubmed yang diterbitkan 3 tahun terakhir yaitu antara 2019-2021, perawat sebagai bagian dari tim kesehatan dituntut untuk mampu bekerja sama dengan profesi kesehatan lain di rumah sakit dengan berbagai karakteristik antara lain, pendidikan, jenis kelamin, usia, status kepegawaian dan lama kerja, perawat dituntut untuk berkomitmen dalam upaya menjaga keselamatan pasien di rumah sakit.

**Kata kunci :** interprofesional collaboration, nurse, patient safety

### PENDAHULUAN

Keselamatan pasien merupakan aspek penting dalam pelayanan rumah sakit, banyak studi menyebutkan bahwa kejadian medical error dan diagnostic error masih terjadi di tempat pelayanan kesehatan di seluruh dunia termasuk juga di negara berkembang (1), padahal upaya untuk mencegah insiden keselamatan pasien<sup>12</sup> dicanangkan sejak dua dekade yang lalu (2).

Pada era globalisasi sekarang ini, rumah<sup>10</sup> sakit dituntut untuk memberikan pelayanan yang bermutu kepada pasien, dimana mutu pelayanan kesehatan di rumah sakit salah satunya ditentukan oleh keselamatan<sup>6</sup> pasien di rumah sakit (3) (4). Keselamatan pasien akan dapat dilaksanakan dengan baik apabila rumah sakit merubah paradigma lama yaitu yang berfokus pada penyakit menjadi paradigma baru yaitu pelayanan yang berfokus pada pasien (patient center care)(5).

Institute of Medicine (IOM) pada tahun 2001 menetapkan enam dimensi mutu pelayanan pada abad 21, yaitu patient centered, effective, efficient, safe, equitable, dan timely (6). Patient center care (PCC) merupakan pelayanan yang menjadikan pasien sebagai pusat pelayanan dimana rumah sakit memberikan pelayanan holistik, adanya koordinasi antar tenaga kesehatan, keterlibatan pasien dalam perawatan, tindakan berbasis bukti, penggunaan teknologi informasi dan waktu pelayanan tepat serta komunikasi antar pemberi pelayanan berjalan dengan baik (7).

Keselamatan pasien dipengaruhi oleh budaya keselamatan pasien dan keterlibatan tenaga kesehatan (8), kerjasama tim yang baik akan menurunkan resiko terjadinya medical error (9), kerjasama tim, komunikasi antar tenaga kesehatan dan kolaborasi antar tenaga kesehatan menjadi faktor penting untuk meningkatkan keselamatan pasien (10) (11). Medical error dapat terjadi karena kesalahan resep dokter, pemberian obat oleh perawat yang tidak aman, kurangnya informasi pengetahuan tentang farmasi dari tim perawatan kesehatan, dan kolaborasi antar profesi yang lemah, hal ini dapat dicegah dengan meningkatkan pelaksanaan interprofessional collaboration (12).

Interprofessional collaboration merupakan komponen penting dalam pemberian pelayanan kesehatan untuk meningkatkan keselamatan pasien (13). Study ini bertujuan menganalisis pengaruh interprofessional collaboration dan peran perawat terhadap peningkatan keselamatan pasien di rumah sakit.

#### 14 METODE

Penelitian ini dilakukan dengan melakukan literatur review artikel yang ada di data base science direct, proquest dan pubmed, dengan kata kunci interprofessional education AND patient safety, artikel diseleksi berdasarkan batasan tahun terbit yaitu antara tahun 2019-2021 dengan 13s penuh dan menggunakan bahasa inggris, penyusunan literatur review ini berdasarkan Preferred Reporting Items for Systematic Reviews and Meta-Analyses (PRISMA). Artikel yang ditemukan di data base tersebut kemudian disintesis dan dianalisis dengan kriteria eksklusi dan inklusi, kriteria inklusi pada literatur review ini adalah pelaksanaan patient safety di rumah sakit, sedangkan kriteria eksklusi dalam literatur review ini adalah artikel tentang patient safety yang dilaksanakan di komunitas.

Pencarian literatur awal didapatkan 176 artikel (science direct 17 artikel, proquest 96 artikel, dan pubmed 63 artikel) 170 artikel potensial memenuhi kriteria, setelah diseleksi berdasarkan kesamaan artikel menjadi 165, setelah ditinjau melalui abstrak ada 147 artikel tidak relevan dan tidak bisa diakses full text sehingga menjadi 29 artikel, dari 29 artikel direview menggunakan Joanna Briggs Institute (JBI) 10 artikel full text memenuhi kriteria.

#### HASIL

Hasil 10 artikel didapatkan dari data base science direct, proquest, dan pubmed dengan kata kunci interprofessional collaboration AND patient safety hasilnya adalah sebagai berikut :

1. Judul artikel : Inter-Professionalism in Health Care Post-graduate specialization: an innovative Laboratory (13). Artikel ini menjelaskan bahwa Kolaborasi Antar Profesional (IPC) merupakan komponen penting dari sistem perawatan kesehatan agar berjalan dengan baik. Ini terkait dengan peningkatan keselamatan pasien dan manajemen kasus, penggunaan keterampilan yang optimal dari setiap anggota tim perawatan kesehatan dan penyediaan

layanan kesehatan yang lebih baik. Pendidikan Antar Profesional (IPE), merupakan salah satu faktor kunci dalam pengembangan perilaku positif yang berguna bagi IPC: pelatihan dasar dan pasca-dasar merupakan momen penting untuk meningkatkan kesadaran, melatih dan membantu pelaksanaan IPC. Metode: Sebuah Laboratorium Inovatif yang terinspirasi oleh metodologi Konferensi Konsensus (CC) tentang "Asesmen Keperawatan Naratif Terpadu". Tiga program spesialisasi Pascasarjana terlibat dan ditugaskan untuk tugas yang berbeda di CC, sesuai dengan karakteristik spesialisasi. Hasil: ada keterlibatan mahasiswa dalam pengembangan kompetensi mereka, dan memperoleh keterampilan kolaborasi antar-profesional. Namun ada kurangnya waktu untuk mengembangkan keseluruhan proses. Kesimpulan: Laboratorium eksperimental ini bertujuan untuk menawarkan pengalaman IPC yang nyata kepada siswa. Mereka benar-benar berkolaborasi dengan profesional yang berbeda untuk mencapai tujuan bersama.

2. Judul artikel : <sup>4</sup> Inter-professional nursing education and the roles of swift trust, interaction behaviors, and creativity: A cross-sectional questionnaire survey<sup>(14)</sup>. Artikel ini menjelaskan bahwa meningkatkan kerja tim lintas disiplin di antara semua staf perawatan kesehatan adalah salah satu pendekatan untuk menghadapi tantangan baru ini. Kerja sama tim interdisipliner dapat ditingkatkan melalui pengajaran antarprofesional dalam pendidikan keperawatan, yang memberikan instruksi dari setidaknya dua profesi kepada tim mahasiswa dari spesialisasi yang berbeda. Perilaku yang mendorong kolaborasi dan kreativitas dalam organisasi antara lain kepercayaan yang cepat, perilaku interaktif, dan kreativitas tim. Metode: Sebuah studi cross-sectional dilakukan dengan 210 mahasiswa keperawatan yang terdaftar dalam kursus pendidikan antarprofesional dengan tim interdisipliner termasuk mahasiswa desain. Tiga kuesioner laporan diri menilai persepsi mahasiswa keperawatan tentang kepercayaan cepat, perilaku interaktif, dan kreativitas: 1) kepercayaan cepat mengukur domain berbasis kognitif dan berbasis afektif; 2) perilaku interaktif mengukur domain kontroversi konstruktif, perilaku menolong, dan komunikasi <sup>11</sup>antan; dan 3) kreativitas tim mengukur kemampuan kolaboratif. Skor skala berkisar dari 1 sampai 5; skor yang lebih tinggi menunjukkan kepercayaan yang lebih cepat, perilaku interaktif yang lebih baik, dan kreativitas tim yang lebih besar. Analisis dengan koefisien korelasi Pearson Temuan: Kepercayaan cepat berbasis kognitif berkorelasi positif dengan ketiga domain perilaku interaktif ( $p < 0,01$ ); semua domain dari perilaku interaktif berhubungan positif dengan kreativitas tim ( $p < .01$ ). Perilaku interaktif memediasi hubungan antara kepercayaan cepat berbasis kognitif dan kreativitas tim. Diskusi: Meningkatkan kepercayaan cepat berbasis kognitif dan perilaku interaktif dalam pendidikan interdisipliner untuk mahasiswa keperawatan dapat meningkatkan kreativitas tim. Institusi pendidikan yang terlibat dalam kursus pendidikan interdisipliner untuk perawat harus mendorong perilaku interaktif, yang dapat meningkatkan kepercayaan cepat berbasis kognitif di antara mahasiswa keperawatan dan meningkatkan kolaborasi dan kreativitas.



3. Judul artikel : <sup>2</sup> **Safety attitudes and working climate after organizational change in a major emergency department in Sweden** (15). Artikel menjelaskan bahwa kerja tim dianggap memengaruhi iklim keselamatan staf, yang pada gilirannya memengaruhi keselamatan pasien. Tujuan: Penelitian ini bertujuan untuk mengevaluasi pengaruh perubahan organisasi terhadap proses penilaian tim interprofesional pada persepsi staf tentang kerja tim dan sikap keselamatan di UGD. Metode: Penelitian observasional prospektif ini menggunakan desain cross-sectional dan mengukur persepsi staf UGD tentang domain terkait keselamatan pasien pada dua titik waktu (sebelum dan sesudah intervensi organisasi), menggunakan Kuesioner Sikap Keselamatan. Hasil: Perubahan yang signifikan secara statistik terlihat di antara sampel keseluruhan ( $n = 112$  pada titik waktu satu dan  $n = 121$  pada titik waktu dua) untuk iklim keselamatan, kondisi kerja, dan domain pengenalan stres. Perawat dan dokter menunjukkan sikap dasar yang berbeda dan tanggapan yang berbeda terhadap intervensi antara dua titik waktu. Kesimpulan: Hasil penelitian mencerminkan peningkatan sikap positif secara keseluruhan meskipun terdapat perbedaan respon antara perawat dan profesi medis. Temuan menyoroti peluang untuk meningkatkan sikap di antara anggota tim melalui perubahan organisasi yang ditentukan dan belajar dari satu sama lain. Perubahan organisasi dapat mempengaruhi persepsi staf tentang iklim keselamatan dan kerja tim interprofesional, yang dapat meningkatkan lingkungan kerja UGD.
4. Judul artikel : <sup>1</sup> **Patient Participation in Patient Safety and Its Relationships with Nurses' Patient-Centered Care Competency, Teamwork, and Safety Climate** (16). Penelitian ini menggunakan Metode: Desain penelitian cross-sectional digunakan. Data dikumpulkan dengan 479 perawat dari dua rumah sakit umum di Seoul, Korea, menggunakan kuesioner yang dirancang untuk mengumpulkan data tentang partisipasi pasien dalam aktivitas keselamatan pasien, <sup>5</sup> PCC, persepsi kerja tim, dan iklim keselamatan. Tingkat respons adalah 74,1% ( $N = 355$ ). Analisis data menggunakan statistik deskriptif dan analisis regresi logistik ganda. Hasil: Skor rata-rata untuk partisipasi pasien adalah  $2,76 \pm 0,46$  dari 4,0. Skor rata-rata untuk PCC, kerja tim, dan iklim keselamatan masing-masing adalah  $3,61 \pm 0,46$ ,  $3,64 \pm 0,41$ , dan  $3,35 \pm 0,57$  dari 5,0. Perawat yang mengalami partisipasi pasien yang tinggi dalam aktivitas keselamatan pasien ( $\geq 3,0$ ) memiliki skor PCC, kerja tim, dan iklim keselamatan yang lebih tinggi. Analisis regresi logistik ganda mengungkapkan bahwa skor PCC ( $OR = 2,31, 95\% CI = 1,14-4,70$ ) dan iklim keselamatan ( $OR = 2,51, 95\% CI = 1,09-5,78$ ) adalah faktor signifikan yang terkait dengan partisipasi pasien. Kesimpulan: Tingkat partisipasi pasien dalam aktivitas keselamatan pasien tidak tinggi. PCC perawat, kerja tim, dan iklim keselamatan berhubungan positif dengan partisipasi pasien. Secara khusus, temuan menunjukkan bahwa meningkatkan kompetensi perawat untuk perawatan yang berpusat pada pasien dan menciptakan iklim keselamatan yang kuat penting untuk mendorong partisipasi pasien untuk perawatan kesehatan yang lebih aman.

5. Judul artikel : <sup>1</sup> Iranian Nurses' Attitudes Toward Nurse-Physician Collaboration and its Relationship with Job Satisfaction (17). Penelitian ini menyebutkan bahwa meskipun perawat dan dokter diketahui memiliki tujuan yang sama<sup>5</sup> untuk meningkatkan kualitas perawatan kesehatan, namun ada kesenjangan relasional di antara mereka. Tujuan dari penelitian ini adalah untuk menyelidiki sikap perawat Iran tentang kolaborasi dokter-perawat dan hubungannya dengan kepuasan kerja mereka. Metode: Dalam studi cross-sectional ini, sebanyak 232 perawat direkrut dari tiga rumah sakit pendidikan ilmu kedokteran Universitas Zanjan. Tiga kuesioner digunakan dalam penelitian ini; (a) Kuesioner data demografis, (2) Skala Jefferson Sikap terhadap<sup>23</sup> Kolaborasi Dokter-Perawat (JSAPNC), dan (3) Kuesioner Kepuasan Minnesota. Hasil: Dalam penelitian ini, usia rata-rata peserta adalah 33,22 (SD = 6,13) tahun, 83,8% perawat berjenis kelamin perempuan, 90,8% memiliki gelar sarjana muda dalam bidang keperawatan, dan 82,5% memiliki shift kerja bergilir. Skor rata-rata kolaborasi dokter-perawat ditemukan menjadi 48,07 (SD = 8,95) (berkisar dari 15 hingga 60), dan skor rata-rata skala kepuasan kerja adalah 57,78 (SD = 14,67) (berkisar dari 20 hingga 100). Ada korelasi positif yang signifikan antara sikap<sup>17</sup> terhadap kolaborasi dokter-perawat dan kepuasan kerja di antara perawat ( $r = 0,59$ ,  $P < 0.001$ ). Kesimpulan: Hasil penelitian menunjukkan bahwa kolaborasi antara perawat dan dokter meningkatkan kepuasan kerja perawat yang bekerja dalam pengaturan klinis. Oleh karena itu, perawat dan dokter harus mengembangkan budaya baru kolaborasi satu sama lain dengan tujuan bersama yaitu perawatan pasien yang berkualitas tinggi. Selain itu, administrator perawatan kesehatan harus menerapkan strategi yang memperkuat pengembangan kolaborasi dokter-perawat.
6. Judul artikel : <sup>2</sup> Variables associated with interprofessional collaboration: A comparison between primary healthcare and specialized mental health teams (18). Penelitian ini memiliki dua tujuan: pertama, untuk mengidentifikasi variabel yang terkait dengan kolaborasi interprofesional (IPC) di antara total 315 profesional kesehatan mental (MH) Quebec yang bekerja di tim perawatan primer MH (PCT, N = 101) atau dalam tim layanan khusus. (SSTs, N = 214); dan kedua, untuk membandingkan variabel terkait IPC di MH-PCT vs MH-SST. Metode: Sejumlah besar variabel yang diakui sangat terkait dengan IPC dalam literatur diuji. Model regresi multivariat dilakukan masing-masing pada MH-PCT dan MH-SST. Hasil: Hasil menunjukkan bahwa integrasi pengetahuan, iklim tim dan identifikasi multifokal secara independen dan positif terkait dengan IPC di MH-PCT dan MH-SST. Sebaliknya, berbagi pengetahuan dikaitkan secara positif dengan IPC di MH-PCT saja, dan dukungan organisasi terkait secara positif dengan IPC di MH-SST. Akhirnya, satu variabel (usia) secara signifikan dan negatif terkait dengan IPC di SST. Kesimpulan: Meningkatkan IPC dan membuat tim MH lebih sukses memerlukan pengembangan dan penerapan keterampilan profesional yang berbeda dalam MH-PCT dan MH-SST oleh manajer perawatan tergantung pada tingkat perawatan yang diperlukan (primer atau khusus).

Pelatihan juga diperlukan untuk mempromosikan nilai-nilai interdisipliner dan peningkatan pengetahuan interprofesional tentang IPC.

7. Judul artikel : <sup>1</sup>Inter-professional collaboration of nurses and midwives with physicians and associated factors in Jimma University specialized teaching hospital, Jimma, south West Ethiopia, 2019: Cross sectional study (19). Kolaborasi antar profesional antara profesional sangat penting <sup>18</sup> dalam perawatan kesehatan di mana sebagian besar kegiatan dilakukan dalam sebuah tim. Tujuan utama dari penelitian ini adalah untuk menilai kolaborasi interprofessional perawat dan bidan dengan dokter dan faktor terkait di rumah sakit pendidikan khusus Universitas Jimma dari 20 Maret hingga 8 April 2019. Metode: studi cross-sectional berbasis institusi dilakukan di antara 358 perawat dan 52 bidan yang bekerja di Rumah Sakit Pendidikan khusus Universitas Jimma menggunakan kuesioner terstruktur yang dikelola sendiri. Unit studi dipilih secara simple random sampling dengan menggunakan <sup>22</sup> metode random. Hasilnya dirangkum menggunakan statistik deskriptif dan pernyataan. <sup>22</sup> Tingkat signifikansi ditetapkan pada  $p < 0,05$ . Hasil: Tingkat respon keseluruhan adalah 99,76%. Sekitar dua pertiga, 66,7% ( $n = 273$ ) peserta memiliki kolaborasi antar-profesional yang memuaskan dengan dokter dan 238 (58,2%) memiliki hubungan yang baik dengan dokter. Sekali lagi 234 (57,2%) peserta memiliki sikap yang mendukung kolaborasi interprofesional dengan dokter. Selain itu, signifikansi statistik diperoleh pada hubungan partisipan dengan dokter ( $p = 0,000$ ), pengalaman <sup>7</sup> pekerja mengganggu ( $p = 0,000$ ), sikap terhadap kolaborasi interprofesional dengan dokter ( $p = 0,000$ ) dan status pekerjaan ( $p = 0,001$ ). Kesimpulan: Mayoritas peserta memiliki kolaborasi antar-profesional yang memuaskan dengan dokter dan empat dari banyak faktor yang mungkin dipertimbangkan akhirnya ditemukan signifikan secara statistik. Sekali lagi, terungkap bahwa perawat dan bidan tidak memiliki perbedaan yang signifikan dalam kolaborasi antar profesional mereka dengan dokter.
8. Judul artikel : <sup>3</sup>How to optimize integrated patient progress notes: A multidisciplinary focus group study in Indonesia (20). Penelitian menjelaskan bahwa rumah sakit di Indonesia wajib menerapkan Integrated Patient Progress Notes (IPPNS), yang juga dikenal dengan “Catatan Perkembangan Pasien Terintegrasi”. Catatan kemajuan berisi seluruh interaksi antara pasien dan profesional kesehatan, termasuk dokter, perawat, apoteker, ahli diet, dan fisioterapis. Namun, sejak pertama kali diluncurkan pada tahun 2012, kendala dalam penyelesaian dokumentasi terintegrasi ini masih bersifat nasional. Tujuan: Tujuan dari investigasi ini adalah untuk mengidentifikasi perspektif tenaga kesehatan tentang hambatan dan masalah menggunakan IPPN dan fasilitator yang dapat mengoptimalkan penggunaannya. Metode: Lima diskusi kelompok terarah (FGD) yang melibatkan 37 peserta. Semua FGD direkam, diterjemahkan, dan ditranskrip kata demi kata. Analisis tematik digunakan untuk menafsirkan data. Hasil: Analisis tematik materi mengungkapkan tiga kategori utama untuk masing-masing dari dua topik; Topik 1. Masalah yang dianggap menghambat dokumentasi



terintegrasi: kurangnya pengawasan, kompetensi, beban kerja; topik 2: strategi yang dirasakan untuk mengoptimalkan dokumentasi terintegrasi: dukungan organisasi, praktik bersama, mengintegrasikan teknologi dengan IPPN. Kesimpulan: Hasil penelitian menunjukkan bahwa tenaga kesehatan melihat pentingnya menggunakan IPPN tetapi hanya jika diterapkan dengan dukungan pendidikan dan organisasi dan bahwa penggunaan catatan pasien elektronik mungkin lebih efektif daripada catatan kertas. implementasi IPPN disarankan adanya dukungan pendidikan dan organisasi.

9. Judul artikel : <sup>3</sup> **Interprofessional cooperation: An interventional study among Saudi healthcare teaching staff at King Saud university** (21). Menjelaskan bahwa praktik interprofesional kolaboratif meningkatkan pelayanan kesehatan. Pendidikan interprofessional (IPE) sangat penting dalam meningkatkan kolaborasi dan kualitas perawatan. Studi ini mengeksplorasi sikap staf pengajar terhadap kolaborasi interprofesional di berbagai profesi di bidang Kesehatan di King Saud University, Arab Saudi. Metode: Desain pre-test post-test digunakan dengan 53 staf pengajar dari Health Colleges, King Saud University, sebelum dan sesudah lokakarya pengembangan interprofesional. Versi IEPS 12-item, 3-subskala digunakan untuk mengevaluasi perubahan dalam "kompetensi dan otonomi" 3-subskala, "kebutuhan yang dirasakan untuk kerja sama" dan "persepsi tentang kerja sama yang sebenarnya". Hasil: Penelitian ini melibatkan tenaga pengajar bidang kedokteran, keperawatan, farmasi, kedokteran gigi, ilmu kedokteran terapan dan pelayanan medik darurat. Hasil penelitian menunjukkan sikap positif terhadap IPE, termasuk kompetensi dan otonomi, perlunya kerjasama, dan persepsi kerjasama yang sebenarnya. Kesimpulan: Kolaborasi interprofesional di seluruh pendidikan kesehatan merupakan komponen penting dari IPE, sama seperti IPE merupakan komponen integral dari praktik kolaboratif antarprofesional. Temuan ini memberikan dasar, serta insentif, untuk pengembangan lebih lanjut dalam IPE, dari kebijakan hingga praktik, di seluruh Sekolah Tinggi Kesehatan. Temuan juga menunjukkan staf pengajar memiliki sikap positif terhadap kolaborasi interprofesional.
10. Judul artikel : <sup>2</sup> **Piloting and evaluating feasibility of a training program to improve patient safety for inter-professional inpatient care teams - Study protocol of a cluster randomized controlled trial** (22). Artikel ini menjelaskan bahwa meningkatkan keselamatan pasien adalah tujuan utama dalam sistem perawatan kesehatan di seluruh dunia. Pelatihan keselamatan pasien, selama ini sering kali berfokus pada topik dan profesi tunggal. Oleh karena itu, perlu adanya pelatihan antar profesional tim kesehatan. Dalam studi ini, bertujuan untuk (1) merintis program pelatihan ini dengan membandingkan dua format pelatihan yang berbeda (hanya pembelajaran e-learning versus pembelajaran campuran) dengan kelompok kontrol menunggu dan (2) mengevaluasi kelayakan intervensi. Metode dan analisis: (1) Untuk uji coba intervensi, uji coba terkontrol secara acak cluster akan dilakukan di tiga lokasi studi. Oleh karena itu, kelompok e-learning dan kelompok



pembelajaran campuran akan dibandingkan dengan kelompok kontrol menunggu pada tiga poin penilaian; (2) Kelayakan intervensi akan dievaluasi dengan menggunakan metode kualitatif. Kami akan melakukan wawancara individu yang berfokus pada masalah sebagai bagian dari pengukuran pasca-intervensi untuk mengumpulkan informasi tentang penerimaan, implementasi, faktor pendorong dan hambatan dari perspektif staf. Diskusi: Studi ini mengedepankan program pelatihan yang berpotensi meningkatkan keselamatan pasien dalam rawat inap. Anggota tim perawatan rawat inap antarprofesional dapat menerima pelatihan sistematis dalam tiga kompetensi yang merupakan inti dari manajemen keselamatan pasien. Dengan demikian, kami mengharapkan peningkatan terbesar dalam perilaku terkait Keselamatan staf terkait Kerja Tim, Manajemen kesalahan dan keterlibatan Pasien serta keselamatan pasien yang dirasa secara subyektif dalam kelompok pembelajaran campuran. Selain itu, pengembangan strategi implementasi yang optimal dapat mendorong implementasi intervensi dalam praktik perawatan kesehatan. Akibatnya, intervensi dapat digunakan secara terus menerus dan komprehensif untuk pelatihan lanjutan staf rumah sakit.

## DISCUSSION

Patient safety merupakan salah satu indikator mutu pelayanan kesehatan di rumah sakit, pelaksanaan patient safety dapat dipengaruhi oleh adanya budaya keselamatan pasien di rumah sakit (23). Insiden keselamatan pasien di pelayanan kesehatan dapat berupa medical error karena adanya kesalahan resep oleh dokter, tindakan pemberian obat oleh perawat yang tidak aman, kurangnya pengetahuan tim kesehatan tentang farmasi, dan kolaborasi antar tenaga kesehatan yang kurang (12).

Keselamatan pasien dapat dilaksanakan dengan baik karena adanya kerja sama tim, adanya budaya keselamatan pasien yang baik, dan kompetensi perawatan yang berpusat pada pasien (16). Salah satu yang bisa dilakukan untuk meningkatkan keselamatan pasien adalah melaksanakan interprofessional collaboration (13) (24), dimana poin penting dalam interprofessional collaboration adalah komunikasi yang efektif dan kerjasama yang baik antar tenaga kesehatan (25). Kolaborasi antar tenaga kesehatan (perawat, dokter, bidan, ahli gizi, fisioterapis, apoteker) dapat meningkatkan kepuasan kerja tenaga kesehatan (19) (17).

Interprofessional collaboration dapat dilaksanakan dengan adanya dukungan dari pimpinan pelayanan kesehatan (18), salah satu bentuk interprofessional collaboration adalah penerapan catatan perkembangan pasien terintegrasi (IPPNs), catatan kemajuan berisi dokumentasi pasien yang merupakan bentuk komunikasi dan interaksi antar tenaga kesehatan dalam memberikan pelayanan kepada pasien (26), dalam pelaksanaannya mengalami kendala, hal ini karena kurangnya dukungan dari organisasi, kurangnya pengawasan dan kompetensi serta beban kerja. Pelaksanaan IPPNs dapat ditingkatkan melalui dokumentasi elektronik dan adanya dukungan dari organisasi dan pendidikan kesehatan.

Interprofessional collaboration dapat diajarkan sejak para tenaga kesehatan masih di tingkat pendidikan (27), hal ini perlu adanya dukungan dari institusi pendidikan kesehatan (21). Para mahasiswa antar disiplin yang berbeda akan berinteraksi dan bekerjasama satu dengan yang lain,

dapat meningkatkan kreativitas, meningkatkan kepercayaan diri dan adanya kepuasan antar tenaga kesehatan sehingga diharapkan mampu menyelesaikan masalah pasien, sehingga mereka akan memiliki pengalaman ketika mereka nanti bekerja di tempat pelayanan kesehatan (14).

#### KESIMPULAN

- Pelayanan kesehatan di abad 21 ini mengalami perubahan paradigma yaitu dari berpusat pada penyakit menjadi berpusat pada pasien.
- Keselamatan pasien dapat ditingkatkan dengan cara menerapkan interprofessional collaboration, dimana agar pelaksanaan interprofessional collaboration dapat berjalan dengan baik perlu adanya dukungan dari pimpinan pelayanan kesehatan, dan perlu diajarkan kepada mahasiswa kesehatan sejak masih di tahap pendidikan.
- Interprofessional collaboration yang dipraktekkan oleh mahasiswa kesehatan dapat meningkatkan kreativitas mahasiswa, meningkatkan kepercayaan diri dan meningkatkan kepuasan antar tenaga kesehatan.

# interprofessional collaboration improves patient safety 1

## ORIGINALITY REPORT

11%

SIMILARITY INDEX

11%

INTERNET SOURCES

5%

PUBLICATIONS

5%

STUDENT PAPERS

## PRIMARY SOURCES

1

[pubmed.ncbi.nlm.nih.gov](https://pubmed.ncbi.nlm.nih.gov)

Internet Source

2%

2

[onlinelibrary.wiley.com](https://onlinelibrary.wiley.com)

Internet Source

1%

3

[www.dovepress.com](https://www.dovepress.com)

Internet Source

1%

4

[academic.oup.com](https://academic.oup.com)

Internet Source

1%

5

[garuda.ristekbrin.go.id](https://garuda.ristekbrin.go.id)

Internet Source

1%

6

[mitradiklatcenter.com](https://mitradiklatcenter.com)

Internet Source

1%

7

[id.scribd.com](https://id.scribd.com)

Internet Source

1%

8

[eprints.ums.ac.id](https://eprints.ums.ac.id)

Internet Source

<1%

9

Submitted to iGroup

Student Paper

<1%

|    |                                                                                                                                                                                |      |
|----|--------------------------------------------------------------------------------------------------------------------------------------------------------------------------------|------|
| 10 | <a href="http://journal2.unusa.ac.id">journal2.unusa.ac.id</a><br>Internet Source                                                                                              | <1 % |
| 11 | <a href="http://www.slideshare.net">www.slideshare.net</a><br>Internet Source                                                                                                  | <1 % |
| 12 | <a href="http://Repository.umy.ac.id">Repository.umy.ac.id</a><br>Internet Source                                                                                              | <1 % |
| 13 | Septiana Arini, Farida Kurniawati. "Sikap Guru terhadap Anak Usia Dini dengan Autism Spectrum Disorder", Jurnal Obsesi : Jurnal Pendidikan Anak Usia Dini, 2020<br>Publication | <1 % |
| 14 | <a href="http://caridokumen.com">caridokumen.com</a><br>Internet Source                                                                                                        | <1 % |
| 15 | <a href="http://medworm.com">medworm.com</a><br>Internet Source                                                                                                                | <1 % |
| 16 | <a href="http://media.neliti.com">media.neliti.com</a><br>Internet Source                                                                                                      | <1 % |
| 17 | <a href="http://repository.unism.ac.id">repository.unism.ac.id</a><br>Internet Source                                                                                          | <1 % |
| 18 | <a href="http://riechihuhu.wordpress.com">riechihuhu.wordpress.com</a><br>Internet Source                                                                                      | <1 % |
| 19 | <a href="http://soplestunyphity.blogspot.com">soplestunyphity.blogspot.com</a><br>Internet Source                                                                              | <1 % |
| 20 | <a href="http://text-id.123dok.com">text-id.123dok.com</a>                                                                                                                     |      |



Internet Source

<1%

21

thesis.ummy.ac.id

Internet Source

<1%

22

www.scribd.com

Internet Source

<1%

23

www.yourbrainonporn.com

Internet Source

<1%

Exclude quotes On

Exclude matches

< 8 words

Exclude bibliography On
